# Supplementary material for: Significant enhancement of photocatalytic activity of rutile TiO2compared with anatase TiO2upon Pt nanoparticle deposition studied by far-ultraviolet spectroscopy
Source: Royal Society of Chemistry journal article supplement (doi:10.1039/c4cp00329b), 2014-01-01
Supplement: c4cp00329b1.pdf [file c4cp00329b1.pdf]

[Electronic Supplementary Information]

## Significant enhancement of photocatalytic activity of rutile TiO<sub>2</sub> compared with anatase TiO<sub>2</sub> upon Pt nanoparticle deposition studied by far-ultraviolet spectroscopy

Ichiro Tanabe,\* Takayuki Ryoki and Yukihiro Ozaki\*

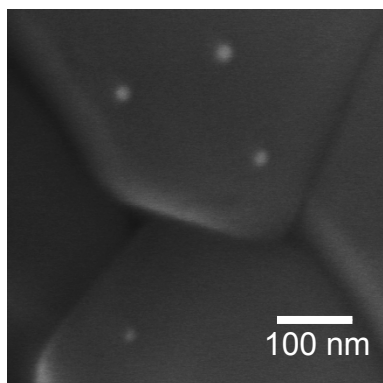

Fig. S1 A typical SEM image of TiO<sub>2</sub>-Pt nanoparticles.

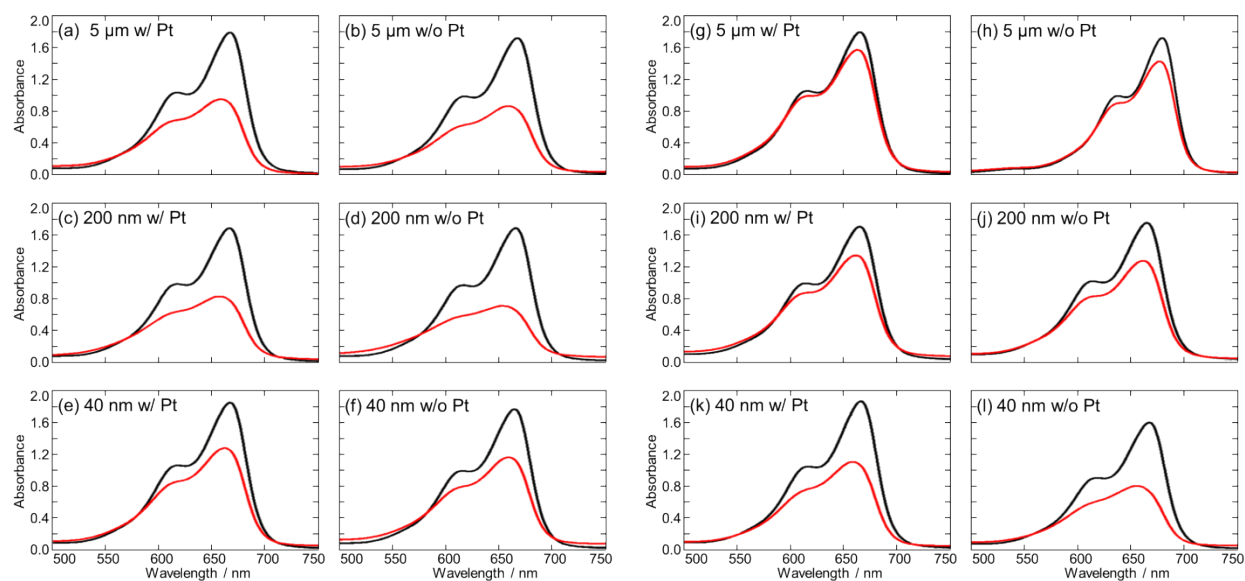

Fig. S2 Absorption spectra of aqueous methylene blue before (black) and after (color) UV light irradiation with (a–f) anatase or (g–l) rutile TiO<sub>2</sub>. TiO<sub>2</sub> particle size and state (i.e., whether they were with or without Pt nanoparticles) are described in each graph.
